# Supplementary material for: Tropicalization strengthens consumer pressure on habitat-forming seaweeds
Source: PubMed Central journal article supplement (PMC5429775; doi:10.1038/s41598-017-00991-2), 2017-04-11
Supplement: 41598_2017_991_MOESM1_ESM.pdf [file 41598_2017_991_MOESM1_ESM.pdf]

# Tropicalization strengthens consumer pressure on habitat-forming seaweeds

Salvador Zarco-Perello<sup>1</sup>, Thomas Wernberg<sup>1</sup>, Tim Langlois<sup>1</sup>, Mathew A. Vanderklift<sup>2</sup>.

<sup>1</sup> School of Biological Sciences and UWA Oceans Institute, The University of Western Australia, Crawley (Perth) 6009, Western Australia, Australia.

<sup>2</sup> Commonwealth Scientific and Industrial Research Organisation (CSIRO) Oceans and Atmosphere Flagship, Indian Ocean Marine Research Centre, Crawley, Western Australia 6009, Australia.

## Supplementary Material

Table S1. Documented species of temperate/subtropical and tropical herbivorous fish that consume kelp in different parts of the world. Consumption is reported as not mentioned (n/a), grams per day (g/d), bites per hour ( $b\ h^{-1}$ ), percentage of stomach content (%), percentage of length (%L) and percentage of area (%A). Analysis of herbivory was reported as anecdotal (Anec), observational (Obs), feeding rate in laboratory (Lexp) or fieldwork (Fexp) and Stomach content (StCn).

| TEMPERATE            |                                                                                           |                                                               |                            |          |                                |
|----------------------|-------------------------------------------------------------------------------------------|---------------------------------------------------------------|----------------------------|----------|--------------------------------|
| Location             | Consumer                                                                                  | Kelp                                                          | Consumption                | Analysis | Reference                      |
| USA, California      | <i>Girella nigricans</i><br><i>Medialuna californiensis</i>                               | <i>Macrocystis</i><br>and<br><i>Pterygophora</i>              | n/a                        | Anec     | Harris et al. 1984             |
| Spain, North         | <i>Sarpa salpa</i><br><i>Boops boops</i>                                                  | <i>Undaria pinnatifida</i> and<br><i>Saccharina latissima</i> | n/a                        | Obs      | Peteiro and Freire 2012        |
| Japan, South         | <i>Calotomus japonicus</i><br><i>Prionurus Scalprum</i><br><i>Stephanolepis cirrhifer</i> | <i>Ecklonia kurome</i>                                        | 131 g/d<br>3 g/d<br>19 g/d | Lexp     | Kiryama et al 2001             |
| Australia, Southeast | <i>Olisthops cyanomelas</i>                                                               | <i>Ecklonia radiata</i>                                       | 99 %                       | StCn     | Andrew and Jones 1990          |
| Australia, South     | Syn. <i>Caranx cyanomelas</i>                                                             |                                                               | 1 – 99 %                   | StCn     | Shepherd and Baker 2008        |
| New Zealand          | <i>Aplodactylus arctidens</i>                                                             | <i>Ecklonia radiata</i>                                       | 0.4 – 2.1 %                | StCn     | Choat and Clements 1992        |
|                      | <i>Girella tricuspidata</i>                                                               |                                                               | 5.4 %                      |          |                                |
|                      | <i>Girella elevata</i>                                                                    |                                                               | 3.7 – 14.7 %               | StCn     | Clements and Choat 1997        |
|                      | <i>Kyphosus sydneyanus</i>                                                                |                                                               | 17 – 52 %                  | StCn     | Moran and Clements 2002        |
|                      | <i>Odax cyanoallix</i>                                                                    |                                                               | 6.8 – 84 %                 | StCn     | Zemke- White and Clements 2004 |
|                      | <i>Odax pullus</i>                                                                        |                                                               | 1 – 70 %                   | StCn     | Clements and Choat 1993        |
|                      |                                                                                           | <i>Lessonia variegata</i>                                     | 57 - 76 %                  | StCn     | Choat and Clements 1992        |

**TROPICAL**

| Location          | Consumer                                                                         | Kelp                                                          | Consumption                                                                               | Analysis     | Reference                                                                                     |
|-------------------|----------------------------------------------------------------------------------|---------------------------------------------------------------|-------------------------------------------------------------------------------------------|--------------|-----------------------------------------------------------------------------------------------|
| Japan             | Parrotfish (no id)                                                               | <i>Ecklonia sp.</i>                                           | n/a                                                                                       | Obs          | Hasegawa 2010                                                                                 |
|                   | <i>Calotomus japonicus</i>                                                       | <i>Ecklonia kurome</i>                                        | 131 g/d                                                                                   | Lexp         | Kiriyama et al 2001                                                                           |
|                   | <i>Thamnaconus modestus</i>                                                      |                                                               | 19 g/d                                                                                    |              |                                                                                               |
|                   | <i>Kyphosus vaigiensis</i> syn. <i>K. lembus</i>                                 |                                                               | 51 g/d                                                                                    |              |                                                                                               |
|                   | <i>Kyphosus bigibbus</i>                                                         | <i>Ecklonia radiata</i>                                       | < 1 %                                                                                     | StCn         | Clements and Zemke-White 2008                                                                 |
|                   | <i>Kyphosus bigibbus</i>                                                         | <i>Eckloniopsis radicata</i> and <i>Undaria pinnatatifida</i> | 0 – 60 %                                                                                  | StCn         | Yatsuya et al 2015                                                                            |
|                   | <i>Siganus fuscescens</i>                                                        | <i>Ecklonia cava</i>                                          | 29 – 100 %L                                                                               | Fexp         | Hasegawa 2010                                                                                 |
|                   |                                                                                  | <i>Ecklonia cava</i> , <i>Eisenia arborea</i>                 | 0 – 100 %A                                                                                | Fexp         | Nimura et al. 2007                                                                            |
|                   |                                                                                  | <i>Ecklonia kurome</i>                                        | 76 g/d                                                                                    | Lexp         | Kiriyama et al 2001                                                                           |
| Mediterranean Sea | <i>Siganus luridus</i><br><i>Siganus rivulatus</i>                               | Non-kelp<br><i>Macroalgae</i>                                 |                                                                                           | StCn<br>Fexp | Azzurro et al. 2007;<br>Bariche et al 2009<br>Sala et al. 2011; Vergés,<br>Tomas, et al. 2014 |
| Chile             | <i>Aplocactylus punctatus</i>                                                    | <i>Lessonia trabeculata</i>                                   | 13 – 49 %                                                                                 | StCn         | Caceres et al 1994                                                                            |
| Australia, West   | <i>Kyphosus bigibbus</i><br><i>Kyphosus gladius</i><br><i>Siganus fuscescens</i> | <i>Ecklonia radiata</i>                                       | 3103 ± 1925 b h <sup>-1</sup><br>173 ± 101 b h <sup>-1</sup><br>98 ± 20 b h <sup>-1</sup> | Fexp         | Bennett et al. 2015                                                                           |
| Australia, East   | <i>Siganus fuscescens</i><br><i>Kyphosus bigibbus</i>                            | <i>Ecklonia radiata</i>                                       | >300 b h <sup>-1</sup><br>>300 b h <sup>-1</sup>                                          |              | Verges et al. 2016                                                                            |
| New Zealand       | <i>Kyphosus bigibbus</i>                                                         | <i>Ecklonia radiata</i>                                       | <1 %                                                                                      | StCn         | Clements and Zemke-White 2008                                                                 |

Table S1 References:

- Andrew NL, Jones GP (1990) Patch formation by herbivorous fish in a temperate Australian kelp forest. *Oecologia* 85: 57–68. doi:10.1007/BF00317343.
- Azzurro E, Fanelli E, Mostarda E, Catra M, Andaloro M (2007) Resource partitioning among early colonizing *Siganus Luridus* and native herbivorous fish in the Mediterranean: an integrated study based on gut-content analysis and stable isotope signatures. *J Mar Biol Ass Uni King* 87: 991–998. doi:10.1017/S0025315407056342.
- Bariche M, Sadek R, Azzurro E (2009) Fecundity and condition of successful invaders: *Siganus Rivulatus* and *S. Luridus* (Actinopterygii: Perciformes: Siganidae) in the Eastern Mediterranean Sea. *Acta Ichth Pisc* 39:11-18. <http://yadda.icm.edu.pl/yadda/element/bwmeta1.element.dl-catalog-9188dc81-e59d-4e7a-96db-75ff814c0dcf>.
- Bennett S, Wernberg T, Harvey ES, Santana-Garcon J, Saunders BJ (2015) Tropical herbivores provide resilience to a climate-mediated phase shift on temperate reefs. *Ecol Lett* 18: 714–23. doi:10.1111/ele.12450.

- Caceres CW, Fuentes LS, Ojeda FP (1994) Optimal feeding strategy of the temperate herbivorous fish *Aplodactylus punctatus*: The effects of food availability on digestive and reproductive patterns. *Oecologia* 99: 118–23. doi:10.1007/BF00317091.
- Choat, JH, Clements KD (1992) Diet in Odacid and Aplodactylid Fishes from Australia and New Zealand. *Mar Fres Res* 43: 1451–59.
- Clements KD, Choat JH (1993) Influence of season, ontogeny and tide on the diet of the temperate marine herbivorous fish *Odax pullus* (Odacidae). *Mar Bio* 117: 213–20. doi:10.1007/BF00345665.
- Clements KD, Choat JH (1997) Comparison of herbivory in the closely-related marine fish genera *Girella* and *Kyphosus*. *Mar Bio* 127: 579–86. doi:10.1007/s002270050048.
- Harris LG, Ebeling AG, Laur DR, Rowley RJ (1984) Community recovery after storm damage: a case of facilitation in primary succession. *Science* 224: 1336–38. doi:10.1126/science.224.4655.1336.
- Hasegawa M (2010) Isoyake studies in Shizuoka Prefecture, Japan. *Bull. Fish. Res. Agen.* 32: 109–14.
- Kiriyama T, Noda M, Fujii A (2001) Grazing and bite marks on *Ecklonia kurome*, caused by several herbivorous fishes. *Suisanzoshoku* 49: 431–38.
- Moran D, Clements KD (2002) Diet and endogenous carbohydrases in the temperate marine herbivorous fish *Kyphosus Sydneyanus*. *J Fish Biol* 60: 1190–1203. doi:10.1111/j.1095-8649.2002.tb01714.x.
- Nimura K, Takatsuji H, Masuda S, Shimamoto J (2007) Growth and maturation of *Ecklonia cava* and *Eisenia arborea* seedlings transplanted along the Coast of Hainan, Shizuoka Prefecture and the grazing caused by herbivorous fish *Siganus fuscus*. *Aqua Science* 55: 541–46. doi:10.11233/aquaculturesci1953.55.541.
- Peteiro C, Freire O (2012) Observations on fish grazing of the cultured kelps *Undaria pinnatifida* and *Saccharina latissima* (Phaeophyceae, Laminariales) in Spanish Atlantic waters. *AACL Bioflux* 5: 189–96.
- Sala E, Kizilkaya Z, Yildirim D, Ballesteros E (2011) Alien marine fishes deplete algal biomass in the Eastern Mediterranean. *PLOS ONE* 6: e17356. doi:10.1371/journal.pone.0017356.
- Shepherd SA, Baker JL (2008) Investigator group expedition 2006: flexible foraging ecology of a temperate herbivore, the Herring Gull, *Olisthops cyanomelas*, in South Australia. *Trans Roy Soc S Aust* 132 : 147–62. doi:10.1080/03721426.2008.10887100.
- Vergés A, Tomas F, Cebrian E, Ballesteros E, Kizilkaya Z, Dendrinis P, Karamanlidis AA, Spiegel D, Sala E (2014) Tropical rabbitfish and the deforestation of a warming temperate sea. *J Ecol* 102: 1518–27. doi:10.1111/1365-2745.12324.
- Vergés, A., Doropoulos, C., Malcolm, H. A., Skye, M., Garcia-Pizá, M., Marzinelli, E. M., ... & Bozec, Y. M. (2016). Long-term empirical evidence of ocean warming leading to tropicalization of fish communities, increased herbivory, and loss of kelp. *Proc. Natl. Acad. Sci.*, 113: 13791-13796. doi: 10.1073/pnas.1610725113
- Yatsuya K, Kiyomoto S, Yoshimura T (2015) Seasonal changes in dietary composition of the herbivorous fish *Kyphosus bigibbus* in Southwestern Japan. *Fish Sci* 81 : 1025–33. doi:10.1007/s12562-015-0919-y.
- Zemke-White WL, Clements KD (2004) Relationship between long-term changes in algal community structure and herbivore diet at the Three Kings Islands, New Zealand. *New Zea J Mar Fresh Res* 38: 837–44. doi:10.1080/00288330.2004.9517283.
